# Supplementary material for: Stimuli-responsive nucleic acid-functionalized metal–organic framework nanoparticles using pH- and metal-ion-dependent DNAzymes as locks
Source: Royal Society of Chemistry journal article supplement (doi:10.1039/c7sc01765k), 2017-01-01
Supplement: c7sc01765k1.pdf [file c7sc01765k1.pdf]

## Electronic Supplementary Information

*of*

### **Stimuli-Responsive Nucleic Acid-Functionalized Metal-Organic-Framework Nanoparticles Using pH- and Metal-Ion Dependent DNazymes as Locks**

Wei-Hai Chen,<sup>1†</sup> Xu Yu,<sup>1†</sup> Alessandro Ceconello,<sup>1</sup> Yang Sung Sohn,<sup>2</sup> Rachel  
Nechushtai,<sup>2</sup> and Itamar Willner<sup>1,\*</sup>

<sup>1</sup>Institute of Chemistry, Center for Nanoscience and Nanotechnology, The Hebrew  
University of Jerusalem, Jerusalem 91904, Israel

<sup>2</sup>Institute of Life Science, The Hebrew University of Jerusalem, Jerusalem 91904, Israel

\*To whom correspondence should be addressed. Tel: 972-2-6585272. Fax: 972-2-  
6527715.

E-mail: willnea@vms.huji.ac.il

†These authors contributed equally to this work.

## Experimental Section

**Materials:** Rhodamine 6G, Methylene Blue, adenosine-5'-triphosphate (ATP), doxorubicin hydrochloride, magnesium (II) chloride, zinc (II) acetate dihydrate, lead (II) acetate trihydrate, calcium (II) acetate hydrate, strontium (II) chloride hexahydrate, nickel (II) acetate tetrahydrate, mercury(II) acetate, 4-(methoxycarbonyl)-phenylboronic acid, 2,5-dibromoaniline, cesium fluoride (CsF), anhydrous tetrahydrofuran (THF), dimethylformamide (DMF), trifluoroacetic acid, palladium(II) acetate ( $\text{Pd}(\text{OAc})_2$ ), triphenylphosphine ( $\text{PPh}_3$ ), dibenzocyclooctyne-sulfo-N-hydroxysuccinimidyl ester (DBCO-sulfo-NHS), tert-butyl nitrite (tBuONO), azidotrimethylsilane ( $\text{TMSN}_3$ ) were purchased from Aldrich/Sigma. Ultrapure water was obtained by a NANOpure Diamond instrument (Barnstead International, Dubuque, IA, USA). All oligonucleotides were synthesized, standard desalting purified, and freeze-dried by Integrated DNA Technologies, Inc.

**Synthesis of amine-functionalized triphenyl carboxylic acid (1):** Amino-functionalized triphenyl carboxylic acid was synthesized according to previously reported method with minor modification.<sup>1</sup> 2,5-Dibromoaniline (1.00 g, 4.0 mmol), 4-(methoxycarbonyl)-phenylboronic acid (2.2 g, 12.25 mmol) and CsF (2.91 g, 19 mmol) were dissolved in 50 mL of anhydrous THF under nitrogen. Then  $\text{Pd}(\text{OAc})_2$  (0.30 g, 1.35 mmol) and  $\text{PPh}_3$  (0.8 g, 3.05 mmol) were added to the mixture that was heated at 50 °C for 48 h. The product was purified by water/dichloromethane extraction and silica gel column chromatography (dichloromethane: ethyl ether = 50: 1 with 0.25% triethylamine). The resulting amino-triphenyldicarboxyl methyl ester (1.2 g, 3.32 mmol) was suspended in 150 mL of THF and heated to 40 °C. Then 80 mL of 5.5 M

KOH in methanol solution were added to the mixture that was stirred at 40 °C for overnight. The resulting white solid was collected by centrifugation, and then treated with 10 mL of trifluoroacetic acid in 80 mL of THF at room temperature for 2 h. The yellow solid product (amino-functionalized triphenyl dicarboxylic acid) was filtered by vacuum filtration and washed with THF, methanol and ether, respectively. <sup>1</sup>H NMR (DMSO-d<sub>6</sub>): δ=12.99 (br, 2H), 8.03 (m, 4H), 7.78 (d, 2H), 7.62 (d, 2H), 7.17 (d, 2H), 7.01 (dd, 1H), 5.12 (br, 2H).

**Synthesis of NMOFs:** The NMOFs were synthesized according to the previously reported method.<sup>1</sup> For the preparation of the NMOFs, 42 mg of amine-functionalized triphenyl carboxylic acid (**1**) and 60 mg of ZrCl<sub>4</sub> were mixed in 100 mL of DMF. 5 mL of CH<sub>3</sub>COOH were added to the mixture that was kept in an 80 °C oven for 5 days. The resulting NMOFs were collected by centrifugation and washed with DMF, triethylamine/ethanol (1:20, V/V), and ethanol, respectively.

**Synthesis of NMOFs with azide group (NMOF-N<sub>3</sub>):** The dried NMOFs (20 mg) were placed in a vial that included 5 mL of THF. Then, 1.5 mL of the tert-butyl nitrite (tBuONO) and 1.4 mL of the azidotrimethylsilane (TMSN<sub>3</sub>) were added. The mixture was incubated at the room temperature overnight to produce the azide intermediate corresponding compound (NMOF-N<sub>3</sub>).

**Synthesis of DBCO-functionalized nucleic acid (**2**) or (**6**):** The covalent tethering of DBCO to nucleic acid (**2**) or (**6**), was achieved by reacting 40 μL of 1 mM nucleic acid (**2**) or (**6**) with 100 μL of 4 mM DBCO-sulfo-NHS in PBS buffer by shaking the

mixture overnight. The solution is filtered with MicroSpin G-25 columns (GE) to separate out and obtain the pure DBCO-DNA.

**Synthesis of nucleic acid (3) or (6)-functionalized NMOFs:** NMOF-N<sub>3</sub> nanoparticles (10 mg, 1 mL) were added to an aqueous solution of DBCO-modified nucleic acid (1) or (5) (100 nmol, 0.5 mL), respectively. The resulting solutions were stirred at 40 °C for 72 h. NaCl was added to the solution over 6 h in three equal aliquots to a final concentration of 0.5 M. The nucleic acid (3) or (6)-functionalized NMOFs were washed three times with a PBS buffer to remove unbound DNA. The UV absorbance of the wash at 260 nm was measured to determine the amount of DNA coating the NMOFs, using the UV-2450 UV-VIS Spectrophotometer (Shimadzu).

**Loading of the nucleic acid (6)-functionalized NMOFs:** The (6)-functionalized NMOFs, 5 mg in 2 mL PBS buffer solution (pH = 7.4), were incubated with Rhodamine 6G (0.5 mg/mL), Methylene Blue (0.5 mg/mL) or the anticancer drug doxorubicin (1.0 mg/mL) for 24 h. The NMOFs were then transferred to a buffer solution and hybridized with nucleic acid (7), (8) or (9), respectively, leading to the locked state of the loaded duplex DNA-functionalized NMOFs. After 12 h, the NMOFs were washed several times to remove the excess and nonspecifically bound Rhodamine 6G, Methylene Blue or doxorubicin.

**Evaluation of the loading of Methylene Blue in the NMOFs:** Fig. S2 shows the calibration curve corresponding to the fluorescence intensities as a function of concentration of Methylene Blue at pH = 5.0. The saturated fluorescence of the released Methylene Blue from 10 µg of NMOFs (dilutes 30 times before a measurement) at pH

= 5.0, reveals a fluorescence intensity of ca. 500 a.u, Fig. S1(A). Placing this value in the calibration curve shows in Fig. S2 (marked with arrow) indicates the release of 2.48  $\mu\text{M}$  that translates to a loading of 72.2  $\mu\text{mole Methylene Blue}\cdot\text{gram}^{-1}$  of NMOFs.

**Evaluation of the loading of DOX in the NMOFs:** Fig. S3 shows the calibration curve corresponding to the fluorescence intensities as a function of concentration of DOX at pH = 5.0. The saturated fluorescence of the released DOX from 10  $\mu\text{g}$  of NMOFs (dilutes 30 times before a measurement) at pH = 5.0, reveals a fluorescence intensity of ca. 1100 a.u, Fig. 2(C). Placing this value in the calibration curve shows in Fig. S3 (marked with arrow) indicates the release of 1.76  $\mu\text{M}$  that translates to a loading of 52.8  $\mu\text{mole DOX}\cdot\text{gram}^{-1}$  of NMOFs.

**Cell culture:** Malignant breast epithelial cells (MDA-MB-231) were grown in 5%  $\text{CO}_2$  RPMI medium 1640 supplemented with 10% FCS, L-glutamine, and antibiotics (Biological Industries). Normal breast cells (MCF-10A) were maintained in complete growth medium consisting of 1:1 mixture of Dulbecco's modified Eagle's medium and Ham's F12 medium supplemented with horse serum (5%), epidermal growth factor (20 ng/mL), cholera toxin (CT, 0.1  $\mu\text{g}/\text{mg}$ ), insulin (10  $\mu\text{g}/\text{mL}$ ), hydrocortisone (500 ng/mL), and penicillin/streptomycin (1 unit/mL). Cells were plated one day prior to the experiment on 24-well plates or on microscopic slides glued to perforated 3 cm diameter tissue culture plates for cell viability or microscopic measurement.

**Cell uptake of NMOFs:** Normal breast cells (MCF-10A) and malignant breast epithelial cells (MDA-MB-231) were planted at a density of  $8 \times 10^5$  cells in glass-bottomed petri-dish (9.5  $\text{cm}^2$  growth area) with 2 mL medium and incubated with the

DOX-loaded NMOFs (10 µg/mL) in the growth medium for 6 h. Subsequently, the cells were washed with DMEM-HEPES, and the nuclei were stained with DAPI (4,6-diamidino-2-phenylindole). The fluorescence of DOX was measured by epifluorescence microscopy (Nikon TE2000 microscope) equipped with opti-grid. Image analysis was performed using Image-J and Volocity programs.

**Cell viability experiments:** Cell viability was assayed after incubation of the DOX-loaded NMOFs with MCF-10A or MDA-MB-231 cells planted at a density of  $1.8 \times 10^5$  cells per well, in 24-well plates (1.9 cm<sup>2</sup> growth area). After seeding of the cells for 12 hours, the cells were incubated with the DOX-loaded NMOFs for 6 h, followed by intensive washing. The cells were then incubated for 3 days or 5 days with the growth medium and the cell viability was determined with the fluorescent redox probe, Alamar Blue. The fluorescence of Alamar Blue was recorded on a plate-reader (Tecan Safire) after 1 h of incubation at 37 °C ( $\lambda_{ex} = 560$  nm;  $\lambda_{em} = 590$  nm).

## Reference

1. C. He, K. Lu, D. Liu, W. Lin, *J. Am. Chem. Soc.* **2014**, *136*, 5181.

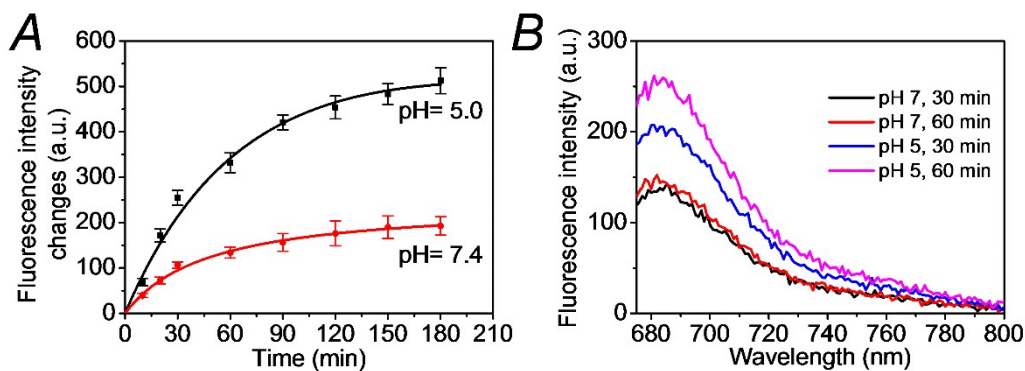

**Fig. S1** (A) Time-dependent fluorescence upon treatment of the Methylene Blue-loaded, (3)/(4)-capped NMOFs at pH = 7.4 and pH = 5.0. The fluorescence corresponds to the released Methylene Blue. (B) Fluorescence spectra of the released Methylene Blue from the (3)/(4)-capped NMOFs.

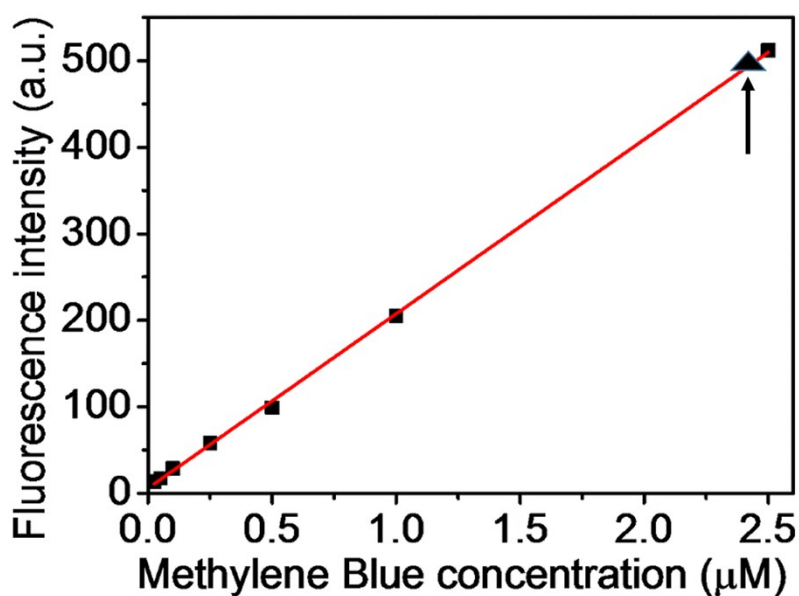

**Fig. S2** The calibration curve corresponding to the fluorescence intensities as a function of concentration of Methylene Blue. The arrow indicates the saturated fluorescence of the released Methylene Blue from NMOFs, at pH = 5.0.

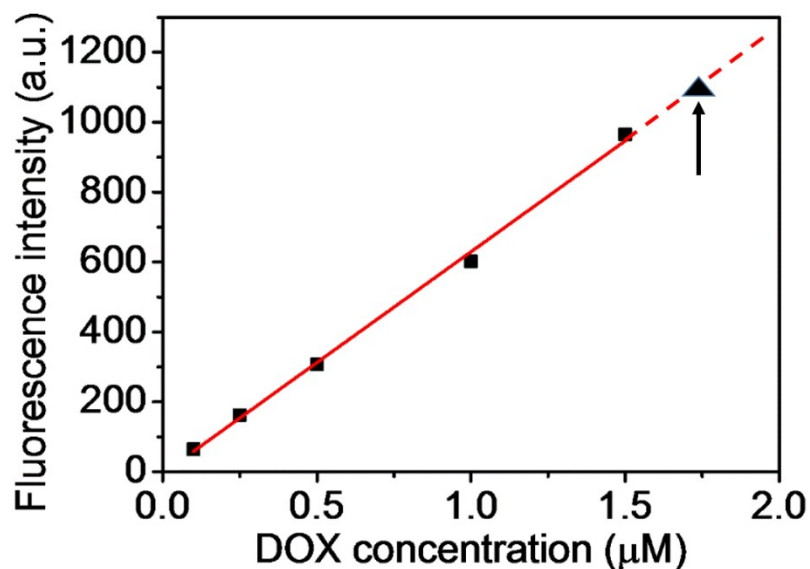

**Fig. S3** The calibration curve corresponding to the fluorescence intensities as a function of the concentration of DOX. The arrow indicates the saturated fluorescence of the released DOX from NMOFs, at pH = 5.0.

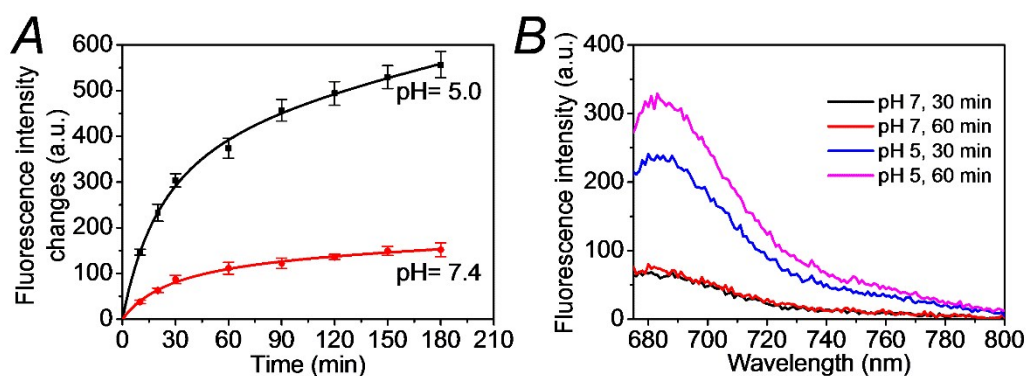

**Fig. S4** (A) Time-dependent fluorescence upon treatment of the Methylene Blue-loaded, (3)/(5)-capped NMOFs at pH = 7.4 and pH = 5.0. The fluorescence corresponds to the released Methylene Blue. (B) Fluorescence spectra of the released Methylene Blue from the (3)/(5)-capped NMOFs.



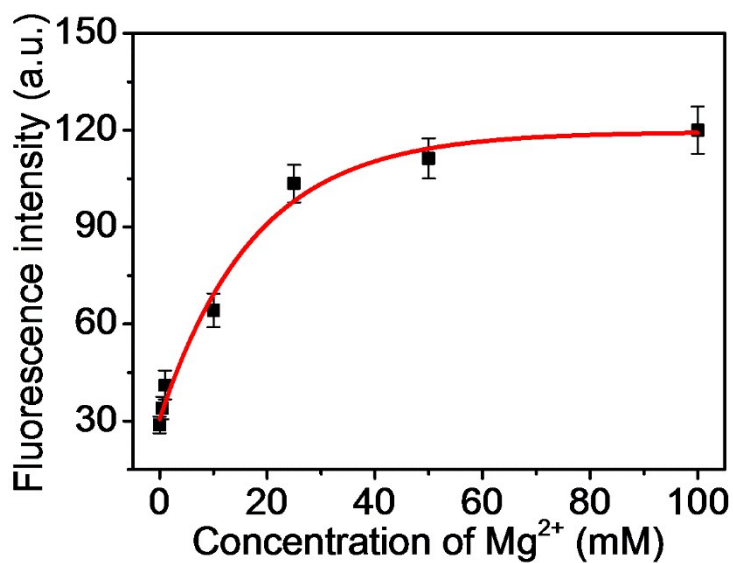

**Fig. S5** The calibration curve corresponding to the fluorescence of the released dye from Rhodamine 6G-loaded, (6)/(7)-capped NMOFs in the presence of variable concentration of Mg<sup>2+</sup> ions.

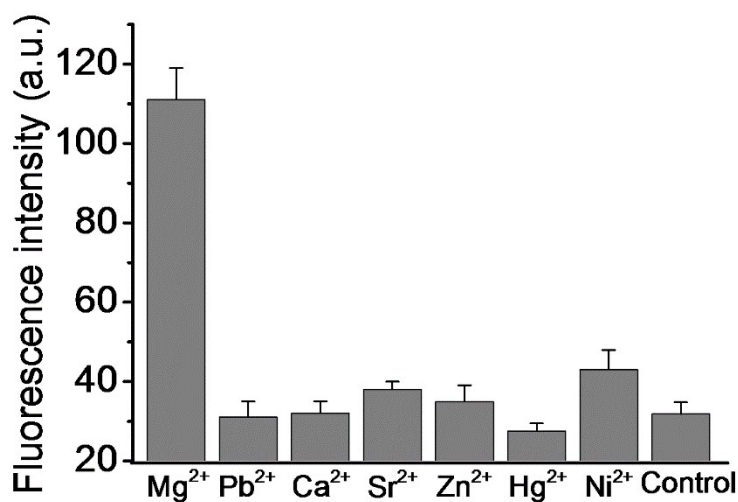

**Fig. S6** Fluorescence changes of Rhodamine 6G upon the treatment of the (6)/(7)-functionalized NMOFs with different metal ions (25 mM) for a time-interval of 60 minutes.

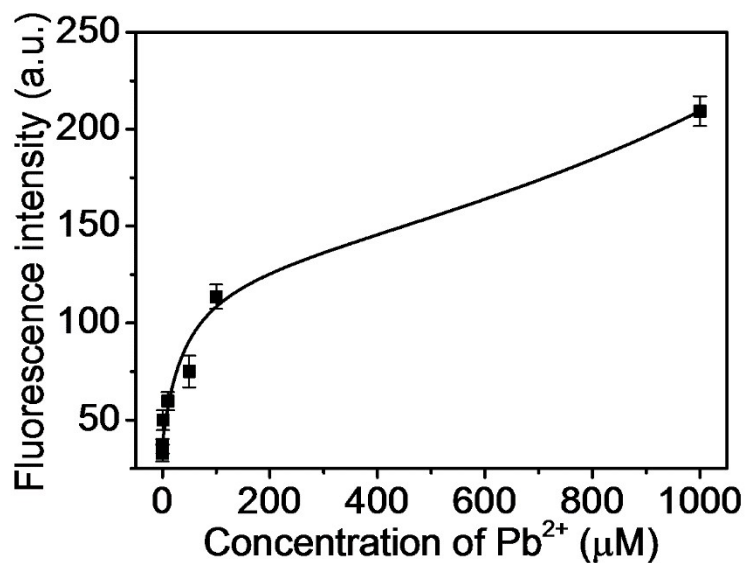

**Fig. S7** The calibration curve corresponding to the fluorescence of the released dye from Methylene Blue-loaded, (6)/(8)-capped NMOFs in the presence of variable concentration of Pb<sup>2+</sup> ions.

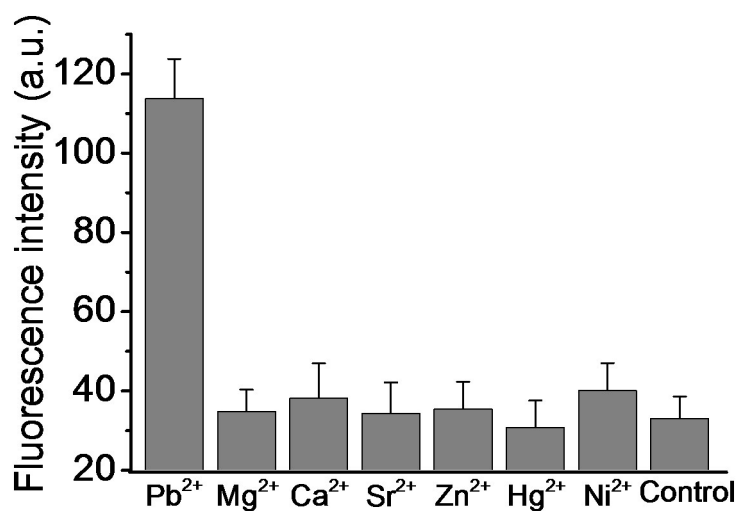

**Fig. S8** Fluorescence changes of Methylene Blue upon the treatment of the (6)/(8)-functionalized NMOFs with different metal ions (100 μM) for a time-interval of 60 minutes.

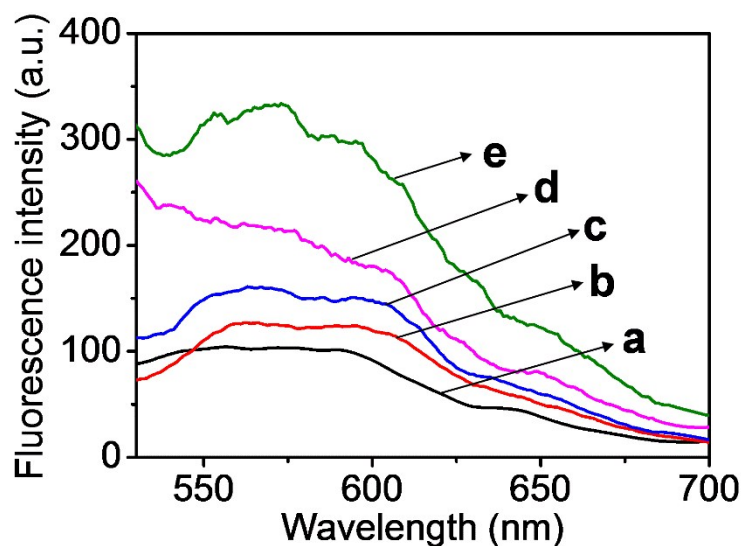

**Fig. S9** The fluorescence spectra of released DOX upon treatment of the (6)/(7) capped DOX-loaded NMOFs with different concentrations of Mg<sup>2+</sup>-ions for a fixed time-interval of 60 minutes: (a) 0 mM, (b) 1 mM, (c) 2 mM, (d) 10 mM, (e) 50 mM.

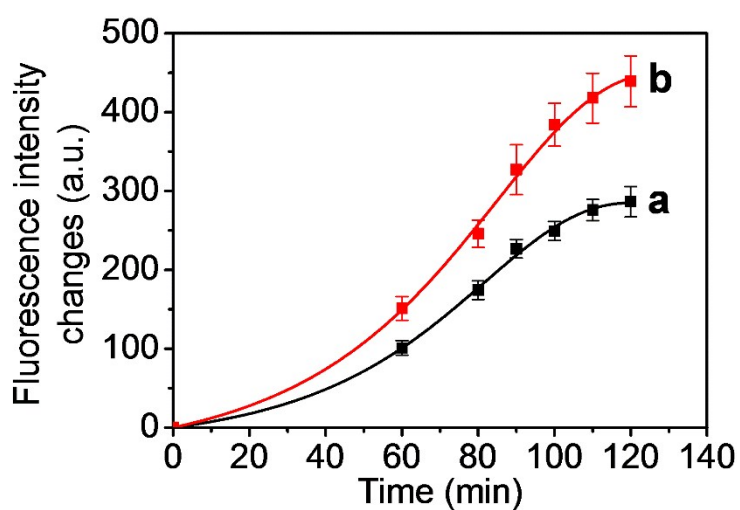

**Fig. S10** Time-dependent release of the DOX load from the (6)/(7)-capped DOX e loaded NMOFs upon treatment with: (a) 0 mM Mg<sup>2+</sup>, (b) 2 mM Mg<sup>2+</sup>.

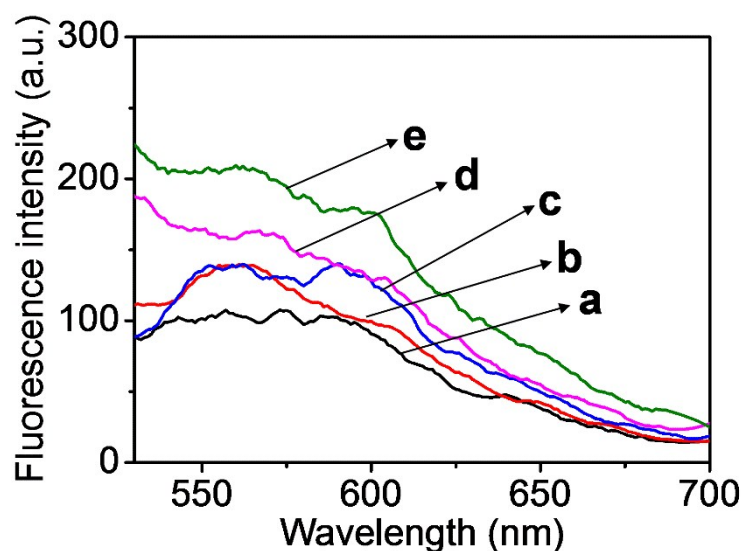

**Fig. S11** The fluorescence spectra of released DOX upon treatment of the (6)/(9) capped DOX loaded NMOFs with different concentrations of Mg<sup>2+</sup>-ions for a fixed time-interval of 60 minutes: (a) 0 mM, (b) 1 mM, (c) 2 mM, (d) 10 mM, (e) 50 mM.

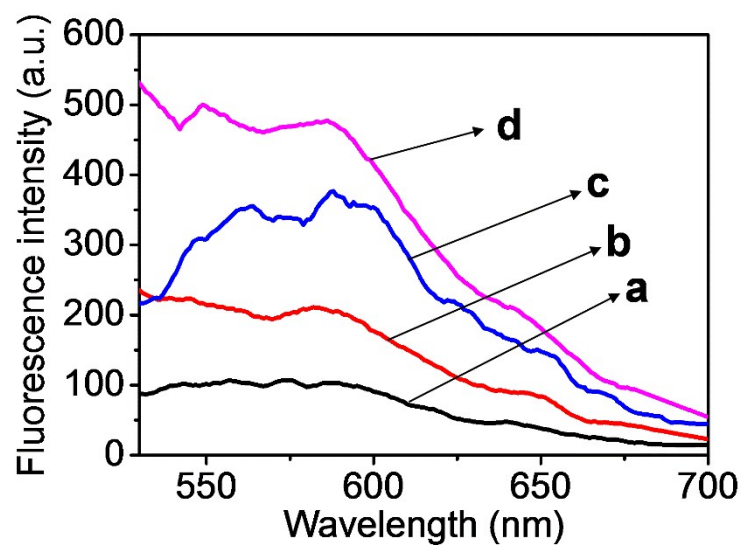

**Fig. S12** The fluorescence spectra of released DOX upon treatment of the (6)/(9) capped DOX loaded NMOFs with different concentrations of ATP/Mg<sup>2+</sup> for a fixed time-interval of 60 minutes: (a) ATP 0 mM, Mg<sup>2+</sup> 0 mM, (b) ATP 1 mM, Mg<sup>2+</sup> 2 mM, (c) ATP 3 mM, Mg<sup>2+</sup> 2 mM, (d) ATP 10 mM, Mg<sup>2+</sup> 2 mM.

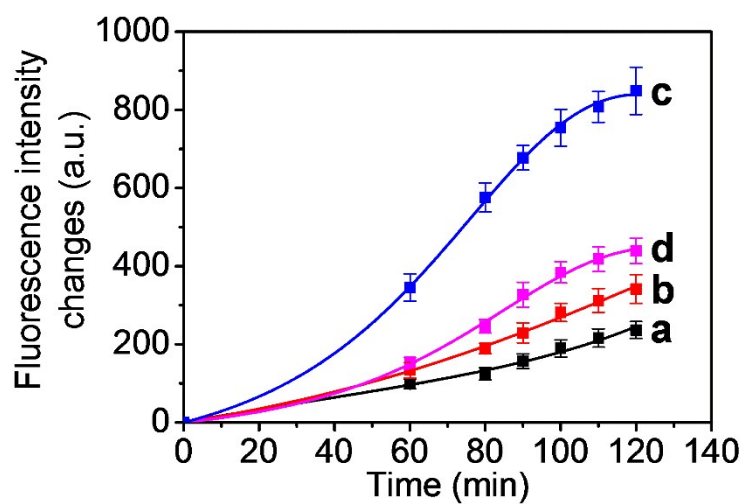

**Fig. S13** Time-dependent release of DOX from the (6)/(9)-capped, DOX-loaded NMOFs in the presence of: (a) Mg<sup>2+</sup> 0 mM, ATP 0 mM; (b) Mg<sup>2+</sup> 2 mM, ATP 0 mM; (c) Mg<sup>2+</sup> 2 mM, ATP 3 mM, (d) Time-dependent release of DOX from the (6)/(7)-capped, DOX-loaded NMOFs in the presence of Mg<sup>2+</sup> 2 mM.
